# Supplementary material for: Different genotypes of Trypanosoma cruzi produce distinctive placental environment genetic response in chronic experimental infection
Source: PubMed Central journal article supplement (PMC5358786; doi:10.1371/journal.pntd.0005436), 2017-03-08
Supplement: pntd.0005436.s002.pdf [file pntd.0005436.s002.pdf]

**S2 Table. Fold Change and adjusted p-values from Microarray analysis.**

| Refseq_NM      | GeneSymbol    | Gene_ID | K98/Control.FC | K98/Control.adj p-value |
|----------------|---------------|---------|----------------|-------------------------|
| NM_001081273.1 | 1600015I10Rik | 69761   | -2,611623      | 1,45E-07                |
| NM_025929.2    | 2010109I03Rik | 67038   | -2,735597      | 7,60E-17                |
| XM_130053.2    | 2010317E24Rik |         | -1,929421      | 0,018582956             |
| XM_916650.3    | 2310043J07Rik | 69665   | 2,321376       | 0                       |
| NM_178098.2    | 4930486L24Rik | 214639  | -1,958369      | 8,25E-05                |
| XM_001478116.1 | 4933400N17Rik | 619289  | -2,146601      | 0,003252443             |
| XM_127434      | 9030624O13Rik |         | -2,635933      | 0,000916733             |
| NM_009338.3    | Acat2         | 110460  | -1,894998      | 0,004211564             |
| NM_009022.2    | Aldh1a2       | 19378   | -2,997067      | 9,81E-05                |
| NM_009022.3    | Aldh1a2       | 19378   | -2,224799      | 0,019485098             |
| NM_053080.2    | Aldh1a3       | 56847   | 1,73214        | 0,008345209             |
| NM_020036.4    | Calm4         | 80796   | 1,678101       | 0,004336831             |
| NM_013652.2    | Ccl4          | 20303   | 2,507951       | 0,000495927             |
| NM_013653.2    | Ccl5          | 20304   | 3,114661       | 9,81E-05                |
| NM_019950.2    | Chst5         | 56773   | -1,950646      | 0,019740092             |
| NM_007728.2    | Coch          | 12810   | 2,893535       | 7,70E-06                |
| NM_139229.3    | Cog8          | 97484   | -2,139679      | 0,044956745             |
| NM_009935.1    | Col6a3        | 12835   | -1,832999      | 0,036009232             |
| NM_013496.2    | Crabp1        | 12903   | 1,798079       | 0,036009232             |
| NM_008411.3    | Cuzd1         | 16433   | -2,575716      | 0,019485098             |
| NM_008176.1    | Cxcl1         | 14825   | 3,007446       | 0,000342845             |
| NM_019568.2    | Cxcl14        | 57266   | -1,753257      | 0,021847105             |
| NM_001029987.1 | Doxl2         | 243376  | -1,882367      | 4,18E-05                |
| NM_001029987.1 | Doxl2         | 243376  | -1,821769      | 0,011006505             |
| NM_007895.2    | Ear2          | 13587   | -1,771954      | 0,004604266             |
| NM_007895.2    | Ear2          | 13587   | -1,735742      | 0,003199546             |
| NM_007895.2    | Ear2          | 13587   | -1,659634      | 0,007067226             |
| NM_017388.1    | Ear3          | 53876   | -1,645913      | 0,001908503             |
| NM_001017422.1 | Ear4          | 53877   | -1,797612      | 0,00032144              |
| NM_007902.2    | Edn2          | 13615   | 3,620466       | 1,52E-07                |
| NM_010332.2    | Ednra         | 13617   | -1,840176      | 0,006653658             |
| NM_201256.2    | Eif4ebp3      | 108112  | -1,634598      | 0,044325322             |
| AK089567       | F830002E14Rik |         | 2,26917        | 0,00804542              |
| NM_010188.4    | Fcgr3         | 14131   | -1,777415      | 0,014022856             |
| NM_008009.2    | Fgfbp1        |         | 1,967485       | 0,000618517             |
| NM_028263.1    | Fgfbp3        | 72514   | -2,452469      | 0,000820362             |
| NM_010216.1    | Figf          | 14205   | -2,460956      | 0,002882989             |
| NM_008191.1    | Guca2b        | 14916   | -3,102059      | 3,05E-07                |

|                |              |           |           |             |
|----------------|--------------|-----------|-----------|-------------|
| NM_010372.1    | Gzmd         | 14941     | -3,435688 | 0,000167553 |
| NM_010375.2    | Gzmg         | 14944     | -3,139537 | 0,002700925 |
| NM_008221.2    | Hbb-y        | 15135     | 2,89731   | 0,000147874 |
| NM_008221.2    | Hbb-y        | 15135     | 2,929904  | 0,000391962 |
| NM_008309.3    | Htr1d        | 15552     | -2,622771 | 4,30E-06    |
| NM_008330.1    | Ifi47        | 15953     | 2,074102  | 0,019560975 |
| XM_001472091.1 | Igh-VJ558    | 16061     | -1,658924 | 0,045320769 |
| NM_018738.3    | Igtp         | 16145     | 2,603193  | 0,000427117 |
| NM_009349.1    | Inmt         | 21743     | -3,584352 | 9,82E-16    |
| NM_009349.3    | Inmt         | 21743     | -2,838754 | 2,38E-14    |
| NM_008407      | Itih3        |           | -1,766531 | 0,000430171 |
| NM_001038607.1 | Kcnh1        | 16510     | -1,986574 | 0,003895833 |
| NM_008940.2    | Klk8         | 259277    | 2,017004  | 0,000304142 |
| NM_010662.1    | Krt13        | 16663     | 1,903555  | 3,11E-07    |
| NM_008469.1    | Krt15        | 16665     | 1,739707  | 0,016126698 |
| XM_001478360.1 | LOC100042514 | 100042514 | -2,742379 | 7,65E-08    |
| XM_977361.1    | LOC665506    | 665506    | 2,17558   | 0,017583162 |
| NM_008509.2    | Lpl          | 16956     | -1,928756 | 0,000683859 |
| NM_177303.4    | Lrrn4        | 320974    | -2,340159 | 0,002381771 |
| NM_023463.3    | Ly6g6c       | 68468     | -1,737138 | 0,026206525 |
| NM_133743.1    | Lypd3        | 72434     | 1,655566  | 0,006448314 |
| NM_010762.4    | Mal          | 17153     | 1,783347  | 4,14E-05    |
| NM_010762.4    | Mal          | 17153     | 2,00013   | 1,22E-08    |
| NM_015776.2    | Mfap5        | 50530     | 1,966989  | 0,021090507 |
| XM_911929.3    | Muc16        | 73732     | 2,334421  | 2,87E-12    |
| NM_175024.3    | Nrn1l        | 234700    | -2,072886 | 0,008694156 |
| NM_016968.4    | Olig1        | 50914     | -2,526019 | 0,000576724 |
| NM_145932.3    | Osta         | 106407    | -2,077838 | 0,014649926 |
| NM_178933.2    | Ostb         | 330962    | -3,060914 | 1,11E-11    |
| NM_133200.3    | P2ry14       | 140795    | -2,867454 | 0,00027545  |
| NM_133200.3    | P2ry14       | 140795    | -2,56593  | 0,001414769 |
| NM_153565.1    | Pcsk9        | 100102    | -1,894878 | 8,85E-05    |
| NM_001024145.1 | Pla2g4f      | 271844    | 1,535122  | 0,011680044 |
| NM_023785.2    | Ppbp         | 57349     | 1,695886  | 0,03436742  |
| NM_023785.1    | Ppbp         | 57349     | 1,717149  | 0,000388842 |
| NM_009475.1    | Prap1        | 22264     | -2,149491 | 0,002882989 |
| NM_019991.1    | Prl2a1       | 56635     | 1,614383  | 0,040654901 |
| NM_026206.2    | Prl7c1       | 67505     | 1,73033   | 0,008144296 |
| NM_023746.3    | Prlpl        | 28078     | -2,249502 | 0,003199546 |
| XM_127254.1    | Prlpn        |           | 1,855823  | 0,045320769 |
| XM_001475793.1 | Rarres1      | 109222    | -1,718788 | 0,004217195 |

| NM_181596.3    | Retnlg        | 245195  | 2,426414      | 0,015871306            |
|----------------|---------------|---------|---------------|------------------------|
| NM_009062.3    | Rgs4          | 19736   | -1,940898     | 0,009952353            |
| NM_009114.1    | S100a9        | 20202   | 2,462287      | 0,000675813            |
| NM_011315.3    | Saa3          | 20210   | 2,330923      | 0,00013952             |
| NM_011681.2    | Scgb1a1       | 22287   | -2,534808     | 3,64E-05               |
| NM_172953.1    | Serpina5      | 268591  | -2,037588     | 0,026299916            |
| NM_009776.1    | Serping1      | 12258   | -1,631042     | 0,046218629            |
| NM_009160.1    | Sftpd         | 20390   | -1,585917     | 5,86E-07               |
| NM_194333.3    | Slc23a3       | 22626   | -1,56289      | 0,038858877            |
| NM_011773      | Slc30a3       |         | -2,203665     | 0,000728395            |
| NM_175316.3    | Slco2b1       | 101488  | -2,01862      | 5,73E-06               |
| NM_009234.3    | Sox11         |         | -2,504781     | 4,14E-05               |
| NM_009234.5    | Sox11         | 20666   | -2,232837     | 0,000607415            |
| NM_009181.1    | St8sia2       | 20450   | -1,738575     | 0,019560975            |
| NM_011638.3    | Tfrc          | 22042   | -3,69901      | 2,30E-17               |
| NM_011638.3    | Tfrc          | 22042   | -3,672227     | 2,18E-18               |
| NM_011581.1    | Thbs2         | 21826   | -1,691707     | 0,021253846            |
| NM_009414.2    | Tph1          | 21990   | -3,91624      | 7,17E-10               |
| NM_009504.3    | Vdr           | 22337   | -2,29761      | 0,027711498            |
| NM_178909.4    | Wdr92         | 103784  | -1,569016     | 0,014599395            |
| NM_153541.3    | Zbtb8b        | 215627  | -2,075331     | 0,01614109             |
| Refseq_NM      | GeneSymbol    | Gene_ID | VD/Control.FC | VD/Control.adj p-value |
|                | 0610037M15Rik |         | 2,348159      | 0,048532657            |
| NM_134054.2    | 1110002B05Rik | 104725  | -2,034264     | 0,000119373            |
| NM_024244      | 1200015N20Rik |         | -2,088994     | 0,00983389             |
| XM_356401.5    | 1700123J19Rik | 73614   | 2,272474      | 0,026411758            |
| NM_027237.1    | 2010003K11Rik | 69861   | -1,957971     | 0,027202375            |
| NM_025929.2    | 2010109I03Rik | 67038   | -1,75882      | 6,10791E-06            |
| NM_025501.1    | 2310007F04Rik | 66344   | 2,46359       | 0,000155467            |
| XM_916650.3    | 2310043J07Rik | 69665   | 2,131408      | 0,001265412            |
| NM_178098.2    | 4930486L24Rik | 214639  | -2,148311     | 1,98112E-05            |
|                | A130010C12Rik |         | 1,560261      | 0,008966394            |
| AK037444       | A130019H11Rik |         | 2,194289      | 0,002239151            |
| XR_001572.1    | A330102K04Rik | 328563  | 2,089129      | 0,040040477            |
| NM_001004174.1 | AA467197      | 433470  | 2,17647       | 4,90467E-07            |
| NM_009338.3    | Acat2         | 110460  | -2,027805     | 0,000703496            |
| NM_172723.4    | Adap1         | 231821  | -2,0523       | 0,002564815            |
| NM_001033207.2 | AI451557      | 102084  | 2,509093      | 9,96139E-05            |
| XM_980696.2    | AI607873      | 226691  | 2,11253       | 0,007947118            |
| NM_134066.2    | Akr1c18       | 105349  | -2,359189     | 1,27316E-06            |
| NM_009022.2    | Aldh1a2       | 19378   | -3,659045     | 2,94704E-10            |

|                |         |        |           |             |
|----------------|---------|--------|-----------|-------------|
| NM_009022.3    | Aldh1a2 | 19378  | -2,517509 | 0,00011127  |
| NM_008486.1    | Anpep   | 16790  | 1,891643  | 0,000359213 |
| NM_173743.3    | Apol9b  | 71898  | 3,33526   | 1,03178E-08 |
| NM_009807.2    | Casp1   | 12362  | 2,865144  | 2,9158E-07  |
| NM_011337.2    | Ccl3    | 20302  | 3,336458  | 1,11931E-08 |
| NM_013652.2    | Ccl4    | 20303  | 4,44517   | 0           |
| NM_013652.2    | Ccl4    | 20303  | 10,596221 | 0           |
| NM_013653.2    | Ccl5    | 20304  | 8,566627  | 0           |
| NM_013654.2    | Ccl7    | 20306  | 3,196578  | 1,11931E-08 |
| NM_013654      | Ccl7    |        | 3,635001  | 1,58636E-11 |
| NM_009917.2    | Ccr5    | 12774  | 2,085242  | 0,001797561 |
| NM_021893.2    | Cd274   | 60533  | 5,402823  | 0           |
| NM_013487.1    | Cd3d    |        | 2,862941  | 1,1444E-05  |
| NM_170702.2    | Cd40    | 21939  | 2,010803  | 0,001172531 |
| NM_013706.1    | Cd52    | 23833  | 2,393968  | 0,000255617 |
| NM_009852.3    | Cd6     | 12511  | 1,936829  | 0,043906642 |
| NM_009852.3    | Cd6     | 12511  | 1,980373  | 0,049141036 |
| NM_001042605.1 | Cd74    | 16149  | 5,741372  | 0           |
| NM_010545.3    | Cd74    | 16149  | 5,830354  | 0           |
| NM_009858.2    | Cd8b1   | 12526  | 3,47692   | 3,43755E-07 |
| NM_009892.1    | Chi3l3  | 12655  | 2,541478  | 1,68679E-05 |
| NM_009892      | Chi3l3  |        | 2,653323  | 9,31698E-08 |
| NM_145126.1    | Chi3l4  | 104183 | 2,522602  | 1,08497E-05 |
| NM_021386.3    | Cldn10  | 58187  | -2,171752 | 9,02599E-06 |
| NM_023878.2    | Cldn10  | 58187  | -2,017496 | 0,004117319 |
| NM_010819.3    | Clec4d  | 17474  | 2,106585  | 0,008875608 |
| NM_007730.2    | Col12a1 | 12816  | -1,815221 | 0,046222989 |
| NM_009935.1    | Col6a3  | 12835  | -1,770963 | 0,005289302 |
| NM_013494.2    | Cpe     |        | -1,651363 | 0,000330979 |
| NM_013496.2    | Crabp1  | 12903  | 2,478582  | 4,40501E-06 |
| NM_011804.2    | Creg1   | 433375 | -1,952592 | 0,000155467 |
| NM_029720.1    | Creld2  | 76737  | -1,624876 | 0,027980939 |
| NM_029720.2    | Creld2  | 76737  | -1,589911 | 0,0431081   |
| NM_033616.3    | Csprs   | 114564 | 2,3699    | 0,00011127  |
| NM_010217      | Ctgf    |        | 1,628157  | 0,001223264 |
| NM_010217.1    | Ctgf    | 14219  | 1,69414   | 8,83433E-06 |
| NM_026906.2    | Cts3    | 117066 | -1,618916 | 0,025018077 |
| NM_022326.3    | Ctsm    | 64139  | -1,554455 | 0,028901924 |
| NM_019568.2    | Cxcl14  | 57266  | -2,047506 | 3,41646E-06 |
| NM_019568.1    | Cxcl14  |        | -1,767754 | 0,001902962 |
| NM_008599.3    | Cxcl9   | 17329  | 17,027535 | 0           |

|                |               |        |           |             |
|----------------|---------------|--------|-----------|-------------|
| NM_199015.2    | D14Ertd668e   | 219132 | 2,178118  | 0,019497374 |
| NM_199015.1    | D14Ertd668e   | 219132 | 2,22515   | 0,002923617 |
| NM_007833.4    | Dcn           | 13179  | -1,782712 | 0,01010367  |
| AK008179       | Dlm1-pending  |        | 2,103932  | 0,049141036 |
| NM_007870.2    | Dnase1l3      |        | 1,791991  | 0,009707565 |
| NM_001033366.1 | Dpcr1         | 268949 | 1,591216  | 0,014213227 |
| NM_176913.3    | Dpep2         | 319446 | -2,000822 | 0,002377683 |
| NM_176913      | Dpep2         |        | -1,923445 | 0,020855798 |
| NM_001013371.2 | Dtx3l         | 209200 | 2,023238  | 0,000270388 |
| NM_053112.1    | Ear10         | 93725  | -2,061652 | 3,56833E-05 |
| NM_001012766.1 | Ear12         | 503845 | -2,373598 | 3,4833E-07  |
| NM_007895.2    | Ear2          | 13587  | -2,130879 | 1,10068E-06 |
| NM_007895.2    | Ear2          | 13587  | -1,816165 | 3,72468E-05 |
| NM_007895.2    | Ear2          | 13587  | -1,801217 | 4,28831E-06 |
| NM_017388.1    | Ear3          | 53876  | -1,975093 | 0,000158955 |
| NM_017388.1    | Ear3          | 53876  | -1,931789 | 2,19602E-06 |
| NM_017388.1    | Ear3          | 53876  | -1,81001  | 0,000175942 |
| NM_001017422.1 | Ear4          | 53877  | -2,034687 | 1,3656E-06  |
| NM_010336.1    | Edg2          | 14745  | -1,749573 | 0,00312003  |
| NM_007902.2    | Edn2          | 13615  | 4,938977  | 0           |
| NM_010332.2    | Ednra         | 13617  | -1,979837 | 0,000422142 |
| NM_001033767.2 | EG240327      | 240327 | 4,775423  | 0           |
| NM_201256.2    | Eif4ebp3      | 108112 | -1,700047 | 0,004529009 |
| AK089567       | F830002E14Rik |        | 2,207336  | 6,28316E-06 |
| NM_024244.3    | Fam13c        | 71721  | -2,34364  | 0,000307342 |
| NM_145946.2    | Fanci         | 208836 | -1,990361 | 0,04681751  |
| NM_175401.3    | Fbxw17        | 109082 | 1,790252  | 0,006419478 |
| NM_144559.1    | Fcgr4         | 246256 | 3,163253  | 3,18136E-09 |
| NM_028263.1    | Fgfbp3        | 72514  | -2,668611 | 2,59682E-06 |
| NM_008013.3    | Fgl2          | 14190  | -1,790955 | 0,026697587 |
| NM_010216.1    | Figf          | 14205  | -2,253501 | 0,011178866 |
| NM_010231.2    | Fmo1          | 14261  | -1,772374 | 0,002691882 |
| NM_008039.2    | Fpr2          | 14289  | 4,927953  | 0           |
| NM_010260.1    | Gbp2          | 14469  | 7,551665  | 0           |
| NM_018734.2    | Gbp3          | 55932  | 3,887224  | 0           |
| NM_018734.3    | Gbp3          | 55932  | 4,279849  | 0           |
| NM_145545.2    | Gbp6          | 229900 | 2,019011  | 0,003524279 |
| NM_145545.2    | Gbp6          | 229900 | 2,12188   | 0,000144083 |
| AK089366       | Gp49a         |        | 2,046424  | 0,014213227 |
| NM_026960.1    | Gsdmdc1       | 69146  | 1,910673  | 0,002239151 |
| NM_026960.3    | Gsdmdc1       | 69146  | 2,060093  | 0,000344259 |

|                |         |        |           |             |
|----------------|---------|--------|-----------|-------------|
| NM_008191.1    | Guca2b  | 14916  | -2,978411 | 7,55722E-08 |
| NM_172810.2    | Gucy1b2 | 239134 | -1,731048 | 0,015405293 |
| NM_001039160.2 | Gvin1   | 74558  | 2,764862  | 3,46923E-08 |
| NM_010372.1    | Gzmd    | 14941  | -2,154716 | 2,29263E-08 |
| NM_010372.2    | Gzmd    | 14941  | -2,14523  | 6,07786E-05 |
| NM_010373.2    | Gzme    |        | -1,946759 | 0,000317088 |
| NM_010373.3    | Gzme    | 14942  | -1,844107 | 0,000843073 |
| NM_010375.2    | Gzmg    | 14944  | -2,162604 | 3,19643E-07 |
| NM_010378.2    | H2-Aa   | 14960  | 3,760857  | 2,70399E-10 |
| NM_207105.2    | H2-Ab1  | 14961  | 2,539023  | 2,40167E-06 |
| NM_207105.1    | H2-Ab1  | 14961  | 2,86936   | 1,58733E-08 |
| NM_207105.2    | H2-Ab1  | 14961  | 3,673354  | 0           |
| NM_010387.2    | H2-DMb1 | 14999  | 2,53715   | 0,000173096 |
| NM_010382.2    | H2-Eb1  | 14969  | 4,737583  | 0           |
| NM_023124.2    | H2-Q8   | 15019  | 2,411084  | 0,023981902 |
| NM_023124      | H2-Q8   |        | 2,876567  | 0,000103536 |
| NM_010395.5    | H2-T10  | 15024  | 2,230112  | 0,017421696 |
| NM_010395.2    | H2-T10  |        | 2,438331  | 0,000973075 |
| NM_001033245.3 | Hk3     | 212032 | 2,608705  | 2,5444E-05  |
| NM_008278      | Hpgd    |        | 1,873258  | 0,000179459 |
| NM_010493.2    | Icam1   | 15894  | 2,356811  | 3,51523E-06 |
| NM_008330.1    | Ifi47   | 15953  | 3,82703   | 0           |
| NM_008332.2    | Ifit2   | 15958  | 4,432878  | 0           |
| NM_008332.2    | Ifit2   | 15958  | 5,411918  | 0           |
| NM_010501.1    | Ifit3   | 15959  | 2,657895  | 1,26627E-08 |
| NM_025378.2    | Ifitm3  | 66141  | 1,681806  | 0,008939025 |
| NM_018738.3    | Igtp    | 16145  | 7,267965  | 0           |
| NM_019440.2    | Iigp2   | 54396  | 3,577034  | 0           |
| NM_008361      | Il1b    |        | 2,46562   | 6,07786E-05 |
| NM_010555.4    | Il1r2   | 16178  | -1,664148 | 0,011331633 |
| NM_031167.3    | Il1rn   | 16181  | 2,259257  | 0,004117319 |
| NM_008324.1    | Indo    | 15930  | 9,031017  | 0           |
| NM_009349.1    | Inmt    | 21743  | -3,739503 | 1,80566E-18 |
| NM_009349.3    | Inmt    | 21743  | -3,056483 | 5,73643E-17 |
| NM_008390.1    | Irf1    | 16362  | 1,928154  | 0,006812138 |
| NM_008390.1    | Irf1    | 16362  | 3,387584  | 0           |
| NM_008390.1    | Irf1    | 16362  | 3,885324  | 0           |
| NM_016850.2    | Irf7    | 54123  | 2,173659  | 4,87898E-05 |
| XM_905897.2    | Irg1    | 16365  | 6,513286  | 0           |
| XM_905096.3    | Irgb10  | 631323 | 3,396839  | 8,18382E-12 |
| NM_008326.1    | Irgm1   | 15944  | 3,713168  | 0           |

|                |              |           |           |             |
|----------------|--------------|-----------|-----------|-------------|
| NM_008407      | Itih3        |           | -2,306407 | 1,07753E-12 |
| NM_008407.1    | Itih3        | 16426     | -2,233902 | 6,42906E-08 |
| NM_001038607.1 | Kcnh1        | 16510     | -1,982909 | 0,031707053 |
| NM_010645.2    | Klk1b1       | 16623     | -2,529474 | 0,02129467  |
| NM_010645.2    | Klk1b1       | 16623     | -2,512734 | 0,027980939 |
| NM_010642.1    | Klk1b21      | 16616     | -2,349454 | 0,000239669 |
| NM_020268.1    | Klk1b27      | 16619     | -2,518375 | 4,78817E-05 |
| NM_020268.3    | Klk1b27      | 16619     | -2,077949 | 0,002118019 |
| NM_010915.1    | Klk1b4       | 18048     | -2,141255 | 0,002600578 |
| NM_008456.2    | Klk1b5       | 16622     | -2,666889 | 1,15415E-06 |
| NM_008940.2    | Klk8         | 259277    | 1,654865  | 0,001061445 |
| NM_010662.1    | Krt13        | 16663     | 1,823921  | 0,000521642 |
| NM_008469.1    | Krt15        | 16665     | 1,934742  | 5,73081E-05 |
| NM_008470.1    | Krt16        | 16666     | 2,109492  | 5,3972E-10  |
| NM_001033131.1 | Krtdap       | 64661     | 1,710166  | 4,12626E-06 |
| NM_033175.2    | Lce3c        | 94060     | 3,247628  | 1,99811E-08 |
| NM_008491.1    | Lcn2         | 16819     | 2,467281  | 5,22827E-06 |
| XM_283647      | Lgr6         |           | -2,278667 | 0,001384357 |
| NM_001033409.3 | Lgr6         | 329252    | -2,091419 | 0,002564815 |
| NM_144799.1    | Lmcd1        | 30937     | 2,057427  | 0,01246225  |
| NM_144799.1    | Lmcd1        | 30937     | 2,101829  | 0,006665915 |
| XM_001471686.1 | LOC100038882 | 100038882 | 2,160817  | 0,002520024 |
| XM_001478360.1 | LOC100042514 | 100042514 | -2,456952 | 1,1847E-06  |
| XM_001471649.1 | LOC100044190 | 100044190 | 2,855246  | 4,19215E-08 |
| XM_001471649.1 | LOC100044190 | 100044190 | 2,981027  | 3,484E-08   |
| XM_001472240.1 | LOC100044430 | 100044430 | 2,598921  | 2,7942E-05  |
| XM_001472253.1 | LOC100044439 | 100044439 | 1,875117  | 0,024592777 |
| XM_001480891.1 | LOC100048556 | 100048556 | 2,375209  | 0,000169128 |
| XM_128064.4    | LOC223672    |           | 3,684725  | 1,50816E-11 |
| XM_354621.1    | LOC380706    |           | 2,015018  | 0,000281467 |
| XM_914287.2    | LOC638301    | 638301    | 3,119567  | 1,26627E-08 |
| XM_918601.3    | LOC641240    | 641240    | 3,646283  | 7,73416E-13 |
| XM_977361.1    | LOC665506    | 665506    | 4,541653  | 1,71661E-12 |
| XM_001002943.1 | LOC677375    | 677375    | 3,79777   | 0           |
| NM_010728.1    | Lox          | 16948     | -2,270429 | 0,000143864 |
| NM_008524.1    | Lum          | 17022     | -1,813745 | 0,034564664 |
| NM_010738.2    | Ly6a         | 110454    | 2,035983  | 4,85484E-10 |
| NM_008529      | Ly6e         |           | 1,799091  | 0,00399098  |
| NM_133743.1    | Lypd3        | 72434     | 2,039031  | 1,01527E-06 |
| NM_010762.4    | Mal          | 17153     | 1,638019  | 0,001061048 |
| NM_015776.2    | Mfap5        | 50530     | 2,177766  | 1,68679E-05 |

|                |           |        |           |             |
|----------------|-----------|--------|-----------|-------------|
| NM_029005.1    | Mlkl      | 74568  | 2,115738  | 0,032908728 |
| NM_026835.2    | Ms4a6d    | 68774  | 2,170688  | 0,01694203  |
| NM_026835.2    | Ms4a6d    | 68774  | 2,604744  | 1,87771E-05 |
| NM_010827.2    | Msc       | 17681  | -2,611217 | 0,002377683 |
| XM_911929.3    | Muc16     | 73732  | 2,127688  | 1,78713E-07 |
| NM_024253.4    | Nkg7      | 72310  | 2,724928  | 0,000359213 |
| NM_175024.3    | Nrn1l     | 234700 | -1,752167 | 0,014906018 |
| NM_145227.1    | Oas2      | 246728 | 2,097103  | 0,015123345 |
| NM_011854.1    | Oasl2     | 23962  | 1,784203  | 0,001490235 |
| NM_011854.2    | Oasl2     | 23962  | 1,87565   | 0,008909156 |
| NM_016968.4    | Olig1     | 50914  | -2,54625  | 3,39042E-05 |
| NM_145932.3    | Osta      | 106407 | -2,06518  | 0,005548737 |
| NM_178933.2    | Ostb      | 330962 | -2,874687 | 6,04019E-16 |
| NM_133200.3    | P2ry14    | 140795 | -2,198109 | 0,009059792 |
| NM_133200.3    | P2ry14    | 140795 | -2,026772 | 0,014759706 |
| NM_001039530.1 | Parp14    | 547253 | 2,149176  | 3,16063E-06 |
| NM_153565.1    | Pcsk9     | 100102 | -1,818257 | 1,92077E-05 |
| NM_016798.2    | Pdlim3    | 53318  | -2,480904 | 4,6635E-06  |
| NM_016798.3    | Pdlim3    | 53318  | -2,213977 | 6,14943E-05 |
| NM_008872      | Plat      |        | -1,821539 | 0,003541067 |
| NM_011961      | Plod2     |        | -1,748948 | 0,036753009 |
| NM_054077.3    | Prelp     | 116847 | 1,551378  | 0,031503604 |
| NM_145984.2    | Prepl     | 213760 | -1,744227 | 0,025213351 |
| NM_013766.1    | Prl3c1    | 27372  | -1,603931 | 0,015405293 |
| NM_023332.3    | Prl8a9    | 67310  | -1,897336 | 0,006365371 |
| NM_023746.3    | Prlpl     | 28078  | -2,17444  | 0,003103995 |
| XM_127254.1    | Prlpn     |        | 1,741836  | 0,018799137 |
| NM_011963.1    | Psg18     | 26438  | -2,095164 | 3,4833E-07  |
| NM_011963.1    | Psg18     | 26438  | -2,050132 | 0,000218681 |
| NM_011963.1    | Psg18     | 26438  | -2,004059 | 3,02319E-06 |
| NM_011964.1    | Psg19     | 26439  | -1,83968  | 0,031441401 |
| NM_013640.1    | Psmb10    | 19171  | 2,138898  | 6,81151E-05 |
| NM_013640.2    | Psmb10    | 19171  | 2,15573   | 0,000319796 |
| NM_013585.2    | Psmb9     | 16912  | 4,34972   | 0           |
| NM_027455.1    | Qpct      | 70536  | -1,577953 | 0,023630261 |
| NM_001040005.2 | Rnf213    | 629974 | 1,952149  | 0,000930941 |
| NM_021384.3    | Rsad2     | 58185  | 1,666692  | 0,01074902  |
| NM_011315.3    | Saa3      | 20210  | 4,22347   | 0           |
| NM_011681.2    | Scgb1a1   | 22287  | -2,450301 | 1,01705E-06 |
| NM_009251.1    | Serpina3g | 20715  | 6,845982  | 0           |
| NM_172953.1    | Serpina5  | 268591 | -1,7737   | 0,025018077 |



|                |          |        |           |             |
|----------------|----------|--------|-----------|-------------|
| NM_009255.2    | Serpine2 | 20720  | -1,871552 | 0,01074902  |
| AK045954       | Serpine2 |        | -1,665302 | 0,005548737 |
| NM_019982.2    | Sez6l    | 56747  | 1,820519  | 0,012965503 |
| NM_016687.2    | Sfrp4    | 20379  | -2,090053 | 0,002218766 |
| XM_129596.2    | Slamf8   |        | 3,720887  | 6,84685E-10 |
| NM_023044.1    | Slc15a3  | 65221  | 2,301212  | 0,002218766 |
| NM_172659.2    | Slc2a6   | 227659 | 3,505101  | 7,08333E-09 |
| NM_175316.3    | Slco2b1  | 101488 | -1,767309 | 7,71435E-11 |
| NM_011407.1    | Slfn1    | 20555  | 2,070726  | 0,006454042 |
| NM_007707.2    | Socs3    | 12702  | 1,891831  | 0,001794276 |
| NM_009263.1    | Spp1     | 20750  | -1,730041 | 0,000103536 |
| NM_011470.1    | Sprr2d   | 20758  | 2,087397  | 2,8724E-05  |
| NM_011157.2    | Srgn     | 19073  | -1,817514 | 0,006783413 |
| NM_009283.3    | Stat1    | 20846  | 2,37933   | 1,48476E-05 |
| NM_001082543.1 | Stfa1    | 20861  | 1,503125  | 0,000175942 |
| NM_026716.2    | Sycn     | 68416  | -1,676614 | 0,018799137 |
| NM_013683.1    | Tap1     | 21354  | 3,019332  | 3,1588E-08  |
| NM_011530.2    | Tap2     | 21355  | 2,276822  | 2,8932E-05  |
| NM_011638.3    | Tfrc     | 22042  | -2,703625 | 2,57855E-13 |
| NM_011638.3    | Tfrc     | 22042  | -2,683345 | 3,81623E-12 |
| NM_009369.1    | Tgfb1    | 21810  | 1,863534  | 0,004922039 |
| NM_011581.1    | Thbs2    | 21826  | -1,850529 | 0,047697241 |
| NM_011905.2    | Tlr2     | 24088  | 2,156339  | 0,009777016 |
| NM_009414.2    | Tph1     | 21990  | -3,696545 | 3,83479E-08 |
| NM_009277.3    | Trim21   | 20821  | 2,023357  | 0,007224353 |
| NM_020557.3    | Tyki     |        | 2,128645  | 0,001510244 |
| NM_023137.2    | Ubd      | 24108  | 8,26174   | 0           |
| NM_023738.4    | Ube1l    | 74153  | 2,485984  | 1,64874E-07 |
| NM_009504.2    | Vdr      | 22337  | -2,093386 | 0,009212267 |
| NM_009504.3    | Vdr      | 22337  | -2,027089 | 0,009997111 |
| NM_009524.2    | Wnt5a    | 22418  | -1,796122 | 0,01050335  |
| NM_153541.3    | Zbtb8b   | 215627 | -1,820433 | 0,037018039 |
