# Supplementary material for: Different genotypes of Trypanosoma cruzi produce distinctive placental environment genetic response in chronic experimental infection
Source: PLOS journal article supplement (doi:10.1371/journal.pntd.0005436), 2017-03-08
Supplement: S6 (10.1371/journal.pntd.0005436.s006) [file journal.pntd.0005436.s006]

**S6 Table. GO-Biological Process with FDR.q.val < 0.05 found by GSEA analysis in VD group.**

| NAME                                                  | SIZE | NES     | FDR.q.val |
|-------------------------------------------------------|------|---------|-----------|
| PROTEOLYSIS                                           | 171  | -2 .885 | 0 .000    |
| CELLULAR CARBOHYDRATE METABOLIC PROCESS               | 116  | -3 .240 | 0 .000    |
| CARBOHYDRATE METABOLIC PROCESS                        | 162  | -3 .455 | 0 .000    |
| CELLULAR LIPID METABOLIC PROCESS                      | 218  | -3 .217 | 0 .000    |
| LIPID METABOLIC PROCESS                               | 275  | -3 .417 | 0 .000    |
| RESPONSE TO WOUNDING                                  | 169  | 4 .080  | 0 .000    |
| LOCOMOTORY BEHAVIOR                                   | 76   | 4 .008  | 0 .000    |
| RESPONSE TO EXTERNAL STIMULUS                         | 275  | 3 .993  | 0 .000    |
| DEFENSE RESPONSE                                      | 212  | 4 .639  | 0 .000    |
| INFLAMMATORY RESPONSE                                 | 114  | 4 .247  | 0 .000    |
| BEHAVIOR                                              | 129  | 3 .895  | 0 .000    |
| BIOSYNTHETIC PROCESS                                  | 414  | -3 .787 | 0 .000    |
| RESPONSE TO STRESS                                    | 450  | 3 .030  | 0 .000    |
| IMMUNE SYSTEM PROCESS                                 | 273  | 4 .152  | 0 .000    |
| IMMUNE RESPONSE                                       | 195  | 3 .568  | 0 .000    |
| RESPONSE TO CHEMICAL STIMULUS                         | 260  | 2 .987  | 0 .000    |
| CELLULAR BIOSYNTHETIC PROCESS                         | 280  | -3 .039 | 0 .000    |
| CELLULAR DEFENSE RESPONSE                             | 41   | 3 .287  | 0 .000    |
| PROTEIN FOLDING                                       | 54   | -2 .781 | 0 .000    |
| CELLULAR LOCALIZATION                                 | 335  | -2 .784 | 0 .000    |
| ORGANIC ACID METABOLIC PROCESS                        | 159  | -2 .786 | 0 .000    |
| CELLULAR COMPONENT ASSEMBLY                           | 270  | -2 .788 | 0 .000    |
| INTRACELLULAR TRANSPORT                               | 252  | -2 .800 | 0 .000    |
| VESICLE MEDIATED TRANSPORT                            | 166  | -2 .838 | 0 .000    |
| NUCLEOBASENUCLEOSIDE AND NUCLEOTIDE METABOLIC PROCESS | 48   | -2 .803 | 0 .000    |
| ESTABLISHMENT OF CELLULAR LOCALIZATION                | 318  | -2 .807 | 0 .000    |
| MACROMOLECULE BIOSYNTHETIC PROCESS                    | 281  | -2 .817 | 0 .000    |
| LIPID BIOSYNTHETIC PROCESS                            | 89   | -2 .826 | 0 .000    |
| MACROMOLECULAR COMPLEX ASSEMBLY                       | 253  | -2 .826 | 0 .000    |
| CARBOXYLIC ACID METABOLIC PROCESS                     | 157  | -2 .831 | 0 .000    |
| NITROGEN COMPOUND METABOLIC PROCESS                   | 144  | -2 .836 | 0 .000    |
| MEMBRANE ORGANIZATION AND BIOGENESIS                  | 120  | -2 .700 | 0 .000    |
| CARBOHYDRATE BIOSYNTHETIC PROCESS                     | 45   | -2 .656 | 0 .001    |
| AMINE METABOLIC PROCESS                               | 131  | -2 .611 | 0 .001    |
| SECRETION                                             | 164  | -2 .577 | 0 .001    |
| RNA PROCESSING                                        | 136  | -2 .583 | 0 .001    |
| MEMBRANE FUSION                                       | 28   | -2 .536 | 0 .001    |
| PROTEIN RNA COMPLEX ASSEMBLY                          | 49   | -2 .524 | 0 .002    |
| GOLGI VESICLE TRANSPORT                               | 43   | -2 .518 | 0 .002    |

|                                                              |     |         |        |
|--------------------------------------------------------------|-----|---------|--------|
| CELL CYCLE GO 0007049                                        | 281 | -2 .501 | 0 .002 |
| MULTI ORGANISM PROCESS                                       | 122 | 2 .704  | 0 .002 |
| MEMBRANE LIPID METABOLIC PROCESS                             | 88  | -2 .468 | 0 .003 |
| G PROTEIN COUPLED RECEPTOR PROTEIN SIGNALING PATHWAY         | 301 | 2 .683  | 0 .003 |
| RESPONSE TO ENDOGENOUS STIMULUS                              | 178 | -2 .461 | 0 .003 |
| RESPONSE TO OTHER ORGANISM                                   | 63  | 2 .652  | 0 .003 |
| ECTODERM DEVELOPMENT                                         | 73  | 2 .627  | 0 .003 |
| NUCLEOTIDE METABOLIC PROCESS                                 | 38  | -2 .389 | 0 .004 |
| REGULATION OF TRANSCRIPTION                                  | 493 | -2 .373 | 0 .005 |
| COAGULATION                                                  | 37  | -2 .358 | 0 .005 |
| EPIDERMIS DEVELOPMENT                                        | 66  | 2 .541  | 0 .005 |
| ESTABLISHMENT OF PROTEIN LOCALIZATION                        | 173 | -2 .345 | 0 .005 |
| CARBOXYLIC ACID TRANSPORT                                    | 34  | -2 .323 | 0 .006 |
| NERVOUS SYSTEM DEVELOPMENT                                   | 362 | -2 .325 | 0 .006 |
| ION HOMEOSTASIS                                              | 116 | 2 .519  | 0 .006 |
| COENZYME METABOLIC PROCESS                                   | 35  | -2 .311 | 0 .006 |
| MACROMOLECULE LOCALIZATION                                   | 212 | -2 .303 | 0 .006 |
| BLOOD COAGULATION                                            | 37  | -2 .297 | 0 .006 |
| ER TO GOLGI VESICLE MEDIATED TRANSPORT                       | 17  | -2 .294 | 0 .006 |
| G1 S TRANSITION OF MITOTIC CELL CYCLE                        | 26  | -2 .287 | 0 .006 |
| LEUKOCYTE ACTIVATION                                         | 55  | 2 .485  | 0 .006 |
| ORGANIC ACID TRANSPORT                                       | 35  | -2 .266 | 0 .007 |
| CELL CELL SIGNALING                                          | 365 | 2 .459  | 0 .007 |
| SECRETION BY CELL                                            | 105 | -2 .259 | 0 .007 |
| CELL ACTIVATION                                              | 59  | 2 .426  | 0 .008 |
| PROTEIN COMPLEX ASSEMBLY                                     | 159 | -2 .242 | 0 .008 |
| RESPONSE TO VIRUS                                            | 39  | 2 .408  | 0 .008 |
| RESPONSE TO BIOTIC STIMULUS                                  | 94  | 2 .399  | 0 .008 |
| RESPONSE TO DNA DAMAGE STIMULUS                              | 145 | -2 .233 | 0 .008 |
| TRANSLATIONAL INITIATION                                     | 31  | -2 .236 | 0 .008 |
| CELLULAR HOMEOSTASIS                                         | 132 | 2 .376  | 0 .008 |
| HOMEOSTATIC PROCESS                                          | 186 | 2 .409  | 0 .009 |
| PHOSPHOLIPID BIOSYNTHETIC PROCESS                            | 35  | -2 .224 | 0 .009 |
| LYMPHOCYTE ACTIVATION                                        | 51  | 2 .377  | 0 .009 |
| REGULATION OF APOPTOSIS                                      | 310 | -2 .198 | 0 .010 |
| PROTEIN KINASE CASCADE                                       | 263 | 2 .338  | 0 .010 |
| BIOPOLYMER CATABOLIC PROCESS                                 | 105 | -2 .201 | 0 .010 |
| REGULATION OF PROGRAMMED CELL DEATH                          | 311 | -2 .181 | 0 .011 |
| CHEMICAL HOMEOSTASIS                                         | 139 | 2 .311  | 0 .011 |
| PROTEIN LOCALIZATION                                         | 194 | -2 .168 | 0 .011 |
| REGULATION OF CELLULAR COMPONENT ORGANIZATION AND BIOGENESIS | 110 | -2 .153 | 0 .012 |

|                                                   |     |         |        |
|---------------------------------------------------|-----|---------|--------|
| GLYCEROPHOSPHOLIPID METABOLIC PROCESS             | 39  | -2 .148 | 0 .013 |
| GLYCOPROTEIN METABOLIC PROCESS                    | 82  | -2 .132 | 0 .013 |
| DNA REPLICATION                                   | 84  | -2 .135 | 0 .013 |
| REGULATION OF RNA METABOLIC PROCESS               | 404 | -2 .129 | 0 .014 |
| HEMOSTASIS                                        | 41  | -2 .113 | 0 .015 |
| GLYCEROPHOSPHOLIPID BIOSYNTHETIC PROCESS          | 28  | -2 .110 | 0 .015 |
| AMINO ACID TRANSPORT                              | 22  | -2 .107 | 0 .015 |
| COFACTOR METABOLIC PROCESS                        | 51  | -2 .103 | 0 .015 |
| CATION HOMEOSTASIS                                | 98  | 2 .246  | 0 .015 |
| HEMOPOIESIS                                       | 66  | 2 .239  | 0 .015 |
| PHOSPHORYLATION                                   | 277 | 2 .226  | 0 .015 |
| NEGATIVE REGULATION OF DEVELOPMENTAL PROCESS      | 183 | 2 .219  | 0 .016 |
| HEMOPOIETIC OR LYMPHOID ORGAN DEVELOPMENT         | 68  | 2 .186  | 0 .016 |
| REGULATION OF BIOLOGICAL QUALITY                  | 372 | 2 .190  | 0 .016 |
| ESTABLISHMENT AND OR MAINTENANCE OF CELL POLARITY | 18  | 2 .195  | 0 .016 |
| REGULATION OF LYMPHOCYTE ACTIVATION               | 30  | 2 .199  | 0 .016 |
| REGULATION OF TRANSLATIONAL INITIATION            | 25  | -2 .085 | 0 .016 |
| ACTIN FILAMENT BASED PROCESS                      | 104 | 2 .163  | 0 .017 |
| ACTIN CYTOSKELETON ORGANIZATION AND BIOGENESIS    | 95  | 2 .170  | 0 .017 |
| CELLULAR CATION HOMEOSTASIS                       | 95  | 2 .137  | 0 .018 |
| CYTOKINE METABOLIC PROCESS                        | 39  | 2 .140  | 0 .018 |
| REGULATION OF CELL CYCLE                          | 162 | -2 .065 | 0 .019 |
| VIRAL GENOME REPLICATION                          | 17  | 2 .101  | 0 .020 |
| CYTOKINE BIOSYNTHETIC PROCESS                     | 38  | 2 .104  | 0 .020 |
| REGULATION OF DEVELOPMENTAL PROCESS               | 400 | -2 .051 | 0 .020 |
| IMMUNE SYSTEM DEVELOPMENT                         | 71  | 2 .085  | 0 .021 |
| CELL CYCLE CHECKPOINT GO 0000075                  | 42  | -2 .033 | 0 .022 |
| REGULATION OF CELL PROLIFERATION                  | 274 | -2 .034 | 0 .022 |
| MYOBLAST DIFFERENTIATION                          | 17  | -2 .021 | 0 .022 |
| AMINO SUGAR METABOLIC PROCESS                     | 18  | -2 .019 | 0 .023 |
| CENTRAL NERVOUS SYSTEM DEVELOPMENT                | 117 | -2 .023 | 0 .023 |
| CELL PROLIFERATION GO 0008283                     | 457 | -2 .012 | 0 .023 |
| CELL CYCLE PROCESS                                | 177 | -2 .024 | 0 .023 |
| PROTEIN MODIFICATION BY SMALL PROTEIN CONJUGATION | 39  | -2 .014 | 0 .023 |
| PROTEIN CATABOLIC PROCESS                         | 60  | -2 .005 | 0 .023 |
| REGULATION OF TRANSCRIPTIONDNA DEPENDENT          | 399 | -2 .007 | 0 .023 |
| PROTEIN AMINO ACID N LINKED GLYCOSYLATION         | 27  | -2 .014 | 0 .023 |
| PHOSPHOLIPID METABOLIC PROCESS                    | 64  | -2 .008 | 0 .023 |
| AROMATIC COMPOUND METABOLIC PROCESS               | 25  | -1 .996 | 0 .023 |
| DNA METABOLIC PROCESS                             | 229 | -1 .997 | 0 .023 |
| INTRACELLULAR PROTEIN TRANSPORT                   | 135 | -1 .974 | 0 .024 |

|                                                                                          |     |         |        |
|------------------------------------------------------------------------------------------|-----|---------|--------|
| DNA REPAIR                                                                               | 116 | -1 .981 | 0 .024 |
| CELLULAR PROTEIN CATABOLIC PROCESS                                                       | 53  | -1 .975 | 0 .024 |
| CELLULAR MORPHOGENESIS DURING DIFFERENTIATION                                            | 45  | -1 .977 | 0 .024 |
| POSITIVE REGULATION OF T CELL ACTIVATION                                                 | 17  | 2 .049  | 0 .024 |
| REGULATION OF BODY FLUID LEVELS                                                          | 50  | -1 .978 | 0 .024 |
| REPRODUCTION                                                                             | 217 | -1 .982 | 0 .024 |
| MONOCARBOXYLIC ACID METABOLIC PROCESS                                                    | 75  | -1 .982 | 0 .025 |
| REPRODUCTIVE PROCESS                                                                     | 128 | -1 .960 | 0 .025 |
| NUCLEOTIDE BIOSYNTHETIC PROCESS                                                          | 16  | -1 .983 | 0 .025 |
| STEROID BIOSYNTHETIC PROCESS                                                             | 22  | -1 .960 | 0 .025 |
| UBIQUITIN CYCLE                                                                          | 44  | -1 .966 | 0 .025 |
| MACROMOLECULE CATABOLIC PROCESS                                                          | 124 | -1 .956 | 0 .025 |
| SULFUR COMPOUND BIOSYNTHETIC PROCESS                                                     | 16  | -1 .964 | 0 .025 |
| CATABOLIC PROCESS                                                                        | 207 | -1 .961 | 0 .025 |
| PHOSPHOINOSITIDE BIOSYNTHETIC PROCESS                                                    | 22  | -1 .962 | 0 .025 |
| HETEROCYCLE METABOLIC PROCESS                                                            | 25  | -1 .949 | 0 .026 |
| MEMBRANE LIPID BIOSYNTHETIC PROCESS                                                      | 43  | -1 .944 | 0 .026 |
| NEGATIVE REGULATION OF METABOLIC PROCESS                                                 | 221 | -1 .945 | 0 .026 |
| MITOTIC CELL CYCLE                                                                       | 143 | -1 .937 | 0 .026 |
| GENERATION OF NEURONS                                                                    | 79  | -1 .938 | 0 .027 |
| PROTEOGLYCAN METABOLIC PROCESS                                                           | 20  | -1 .929 | 0 .027 |
| GLYCOPROTEIN BIOSYNTHETIC PROCESS                                                        | 67  | -1 .930 | 0 .027 |
| POSITIVE REGULATION OF TRANSLATION                                                       | 30  | 2 .023  | 0 .027 |
| PHOSPHOINOSITIDE METABOLIC PROCESS                                                       | 25  | -1 .921 | 0 .028 |
| AXONOGENESIS                                                                             | 41  | -1 .921 | 0 .028 |
| INTERPHASE                                                                               | 64  | -1 .916 | 0 .028 |
| MRNA METABOLIC PROCESS                                                                   | 62  | -1 .917 | 0 .028 |
| LEUKOCYTE DIFFERENTIATION                                                                | 34  | 2 .013  | 0 .028 |
| NEURITE DEVELOPMENT                                                                      | 49  | -1 .922 | 0 .028 |
| POSITIVE REGULATION OF CYTOKINE BIOSYNTHETIC PROCESS                                     | 23  | 2 .004  | 0 .029 |
| NEGATIVE REGULATION OF CELLULAR METABOLIC PROCESS                                        | 219 | -1 .906 | 0 .029 |
| WOUND HEALING                                                                            | 48  | -1 .907 | 0 .029 |
| NEGATIVE REGULATION OF NUCLEOBASENUCLEOSIDENUCLEOTIDE AND NUCLEIC ACID METABOLIC PROCESS | 175 | -1 .903 | 0 .029 |
| SECRETORY PATHWAY                                                                        | 77  | -1 .896 | 0 .030 |
| CELL CYCLE PHASE                                                                         | 157 | -1 .897 | 0 .030 |
| ALCOHOL METABOLIC PROCESS                                                                | 80  | -1 .891 | 0 .030 |
| PROTEIN TRANSPORT                                                                        | 144 | -1 .883 | 0 .031 |
| PROGRAMMED CELL DEATH                                                                    | 390 | -1 .878 | 0 .031 |
| AMINO ACID AND DERIVATIVE METABOLIC PROCESS                                              | 93  | -1 .883 | 0 .031 |
| REGULATION OF MOLECULAR FUNCTION                                                         | 299 | -1 .872 | 0 .031 |
| CELLULAR MACROMOLECULE CATABOLIC PROCESS                                                 | 95  | -1 .869 | 0 .031 |

|                                                          |     |         |        |
|----------------------------------------------------------|-----|---------|--------|
| APOPTOSIS GO                                             | 389 | -1 .879 | 0 .031 |
| CELLULAR CATABOLIC PROCESS                               | 199 | -1 .873 | 0 .031 |
| STEROID METABOLIC PROCESS                                | 59  | -1 .883 | 0 .031 |
| SULFUR METABOLIC PROCESS                                 | 35  | -1 .875 | 0 .031 |
| POSITIVE REGULATION OF DEVELOPMENTAL PROCESS             | 199 | -1 .869 | 0 .031 |
| ENDOSOME TRANSPORT                                       | 19  | -1 .873 | 0 .031 |
| TISSUE DEVELOPMENT                                       | 127 | 1 .979  | 0 .032 |
| B CELL ACTIVATION                                        | 18  | 1 .971  | 0 .032 |
| BRAIN DEVELOPMENT                                        | 48  | -1 .858 | 0 .033 |
| T CELL ACTIVATION                                        | 36  | 1 .963  | 0 .033 |
| MRNA PROCESSING GO 0006397                               | 52  | -1 .855 | 0 .033 |
| NEUROGENESIS                                             | 88  | -1 .852 | 0 .034 |
| EXOCYTOSIS                                               | 24  | 1 .955  | 0 .034 |
| POSITIVE REGULATION OF LYMPHOCYTE ACTIVATION             | 19  | 1 .950  | 0 .034 |
| REGULATION OF IMMUNE SYSTEM PROCESS                      | 55  | 1 .943  | 0 .034 |
| REGULATION OF MAP KINASE ACTIVITY                        | 62  | 1 .938  | 0 .034 |
| LYMPHOCYTE DIFFERENTIATION                               | 24  | 1 .933  | 0 .035 |
| FATTY ACID METABOLIC PROCESS                             | 51  | -1 .844 | 0 .035 |
| RIBONUCLEOPROTEIN COMPLEX BIOGENESIS AND ASSEMBLY        | 63  | -1 .837 | 0 .036 |
| REGULATION OF CYTOKINE BIOSYNTHETIC PROCESS              | 35  | 1 .913  | 0 .037 |
| PROTEIN AMINO ACID PHOSPHORYLATION                       | 248 | 1 .915  | 0 .037 |
| CELLULAR RESPIRATION                                     | 19  | -1 .824 | 0 .038 |
| REGULATION OF T CELL ACTIVATION                          | 24  | 1 .900  | 0 .038 |
| REGULATION OF HYDROLASE ACTIVITY                         | 73  | -1 .821 | 0 .039 |
| PROTEIN UBIQUITINATION                                   | 37  | -1 .813 | 0 .040 |
| CHROMATIN ASSEMBLY OR DISASSEMBLY                        | 26  | -1 .800 | 0 .043 |
| REGULATION OF BLOOD PRESSURE                             | 20  | -1 .795 | 0 .043 |
| VITAMIN METABOLIC PROCESS                                | 16  | -1 .796 | 0 .043 |
| GENERATION OF PRECURSOR METABOLITES AND ENERGY           | 112 | -1 .790 | 0 .044 |
| REGULATION OF MULTICELLULAR ORGANISMAL PROCESS           | 127 | 1 .861  | 0 .046 |
| POST TRANSLATIONAL PROTEIN MODIFICATION                  | 434 | -1 .775 | 0 .047 |
| NUCLEAR TRANSPORT                                        | 79  | -1 .775 | 0 .047 |
| POSITIVE REGULATION OF I KAPPAB KINASE NF KAPPAB CASCADE | 76  | -1 .771 | 0 .048 |
| REGULATION OF CATALYTIC ACTIVITY                         | 252 | -1 .760 | 0 .050 |
